# Supplementary material for: Rapid evolution of blood-brain-barrier-penetrating AAV capsids by RNA-driven biopanning
Source: PubMed Central journal article supplement — Mol Ther Methods Clin Dev. 2020 Dec 23;20:366–78. doi: 10.1016/j.omtm.2020.12.006 (PMC7841218; doi:10.1016/j.omtm.2020.12.006), 2020-12-23
Supplement: mmc1.pdf [file mmc1.pdf]

OMTM, Volume 20

## **Supplemental Information**

### **Rapid evolution of blood-brain- barrier-penetrating AAV capsids by RNA-driven biopanning**

**Mathieu Nonnenmacher, Wei Wang, Matthew A. Child, Xiao-Qin Ren, Carol Huang, Amy Zhen Ren, Jenna Tocci, Qingmin Chen, Kelsey Bittner, Katherine Tyson, Nilesh Pande, Charlotte Hiu-Yan Chung, Steven M. Paul, and Jay Hou**

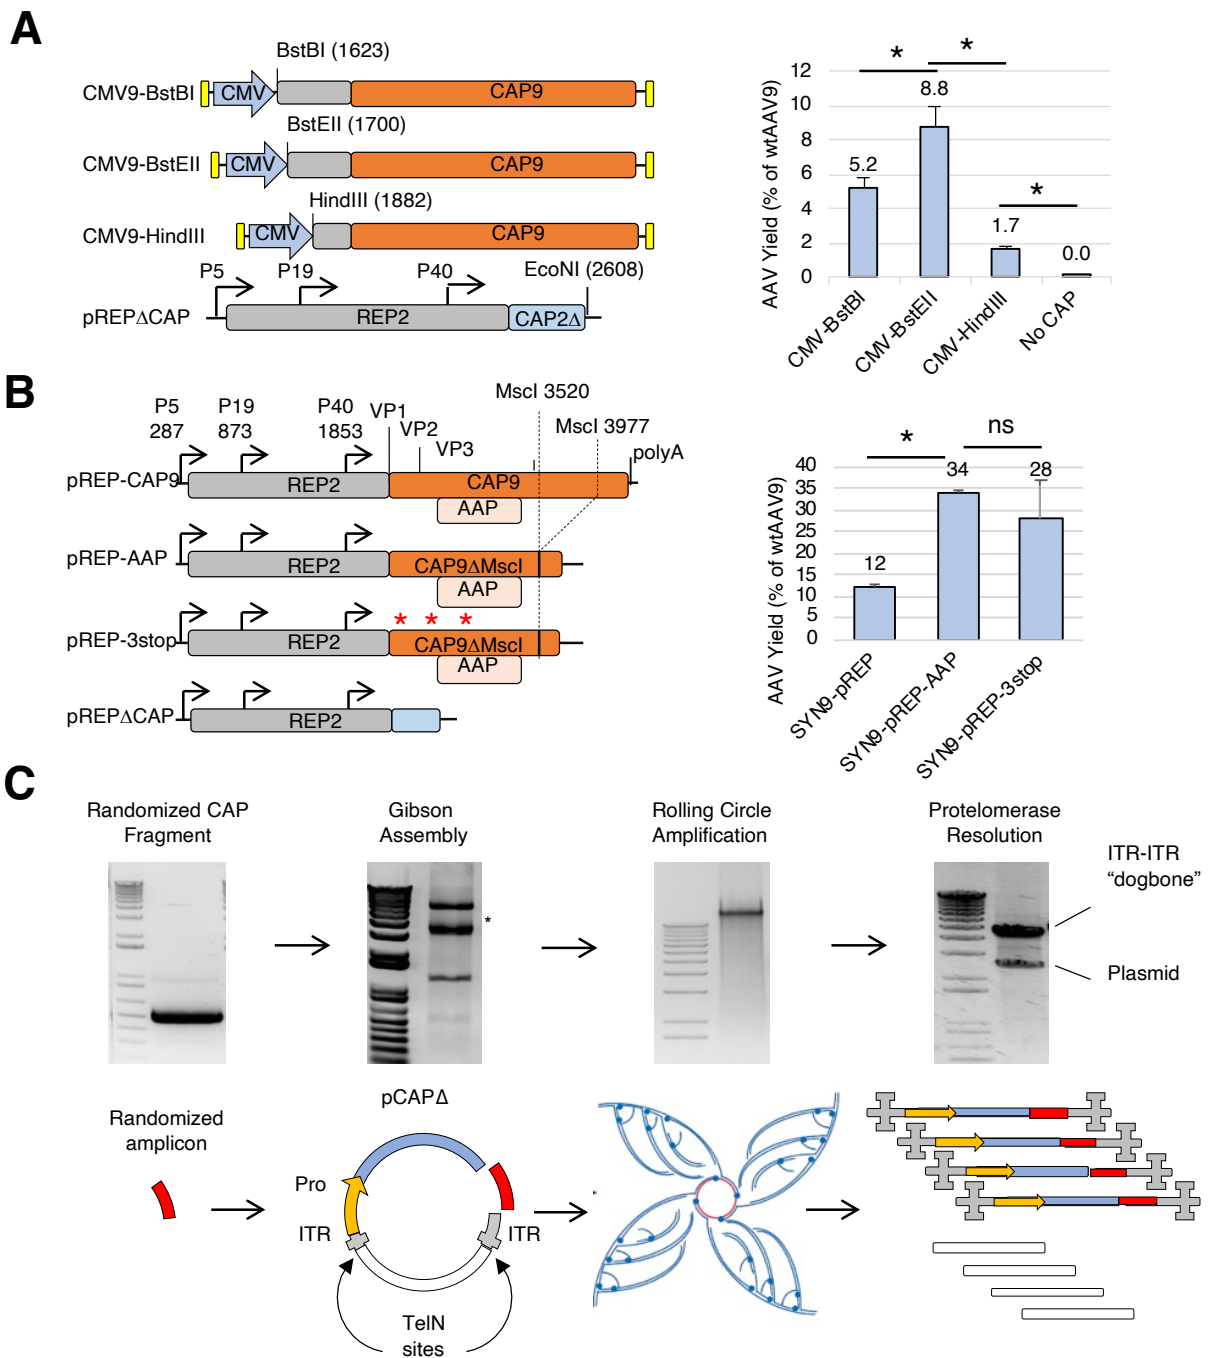

**Figure S1 . TRACER library design and optimization.**

(A) Identification of the minimal *cis* sequences necessary for efficient AAV production. Variable 5' REP sequences from ITR-REP-CAP9-ITR wild-type vector were replaced by a CMV promoter. The REP protein was provided in *trans* by the pREP $\Delta$ CAP vector (depicted). Genome titers obtained with each construct are shown on the right bar graph. Values indicate mean  $\pm$  SD (n=3) percent of wtAAV9 titers. \*p < 0.05 (unpaired t test). (B) Optimization of REP vector. Top: map of the parent REP2CAP9 construct showing the position of AAV promoters, CAP ORF start codons and the MscI truncations. The pREP-3stop vector contains nonsense mutations downstream of each capsid ORF start codon (red asterisks). Each REP plasmid was used to produce an ITR-SYN-CAP9-ITR vector (not pictured). The bar graph represents the mean  $\pm$  SD (n=3) percentage of wtAAV9 genomic titers. \*p < 0.05 (unpaired t test); ns, not significant. (C) High-diversity library generation by cloning-free rolling circle amplification. See materials and methods for details.

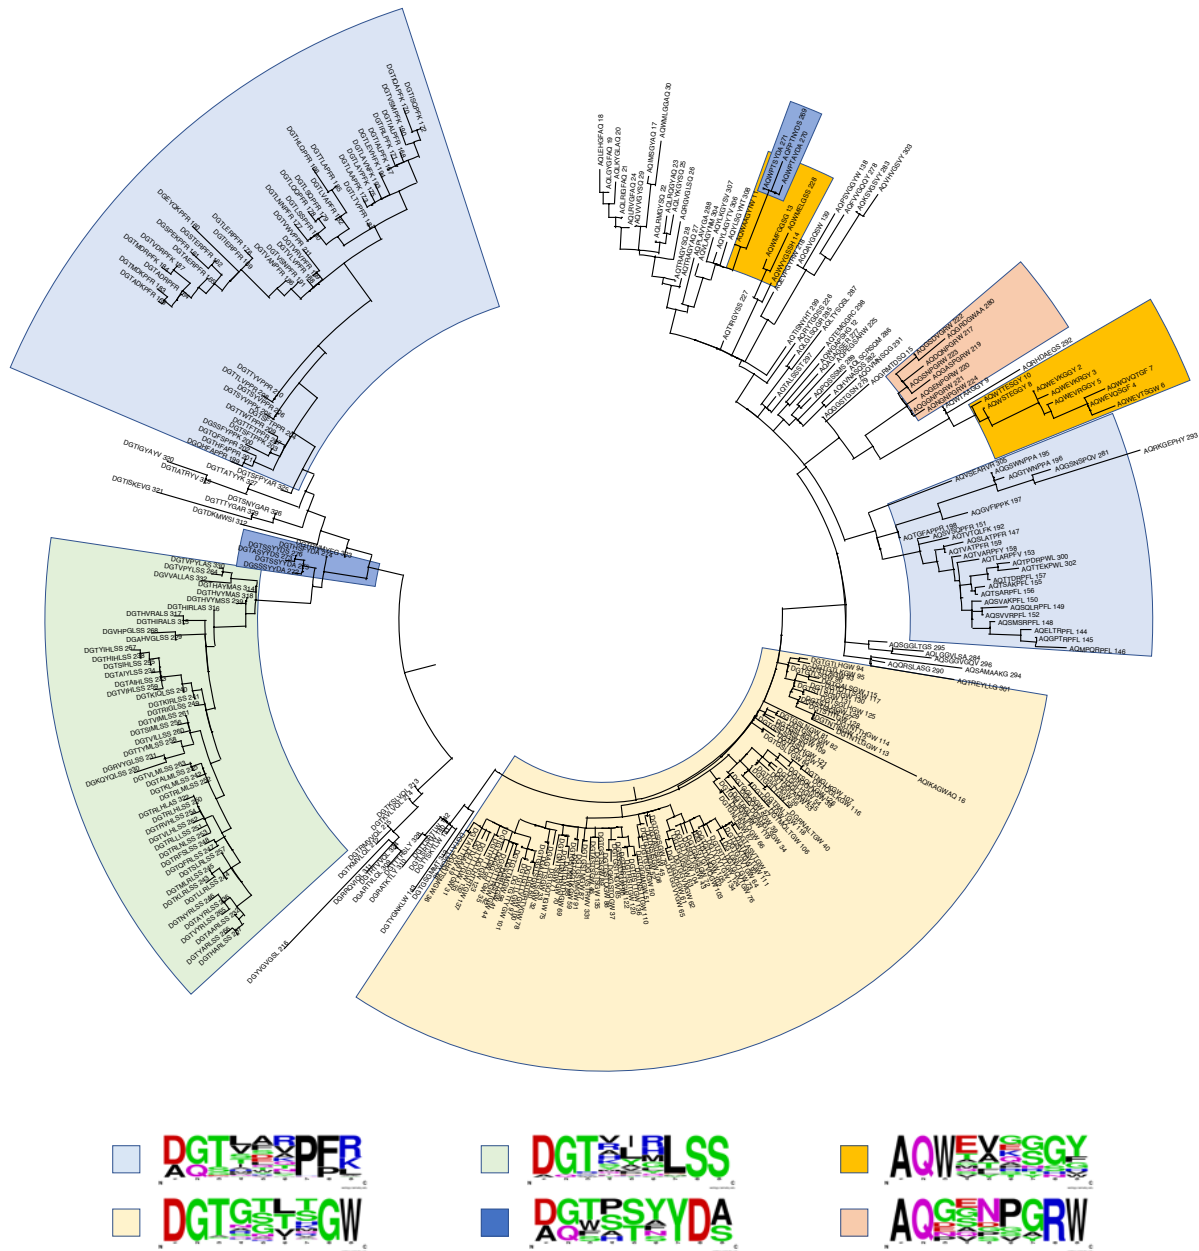

**Figure S2. Phylogenetic Analysis of 330 Top BBB-Crossing Variants.**

Maximum-likelihood phylogeny relating 330 top variants from mouse brain RNA enrichment analysis. Phylogenetic tree of 9-mer variable peptide inserts was constructed using MEGAX. Clusters of peptide sequences sharing high homology are highlighted. Frequency plots of each major cluster are shown at the bottom. The DGTxxxPF[+] consensus motif is shared with PHP.B and PHP.eB capsids and referred to as “PHP-like” in the main text.

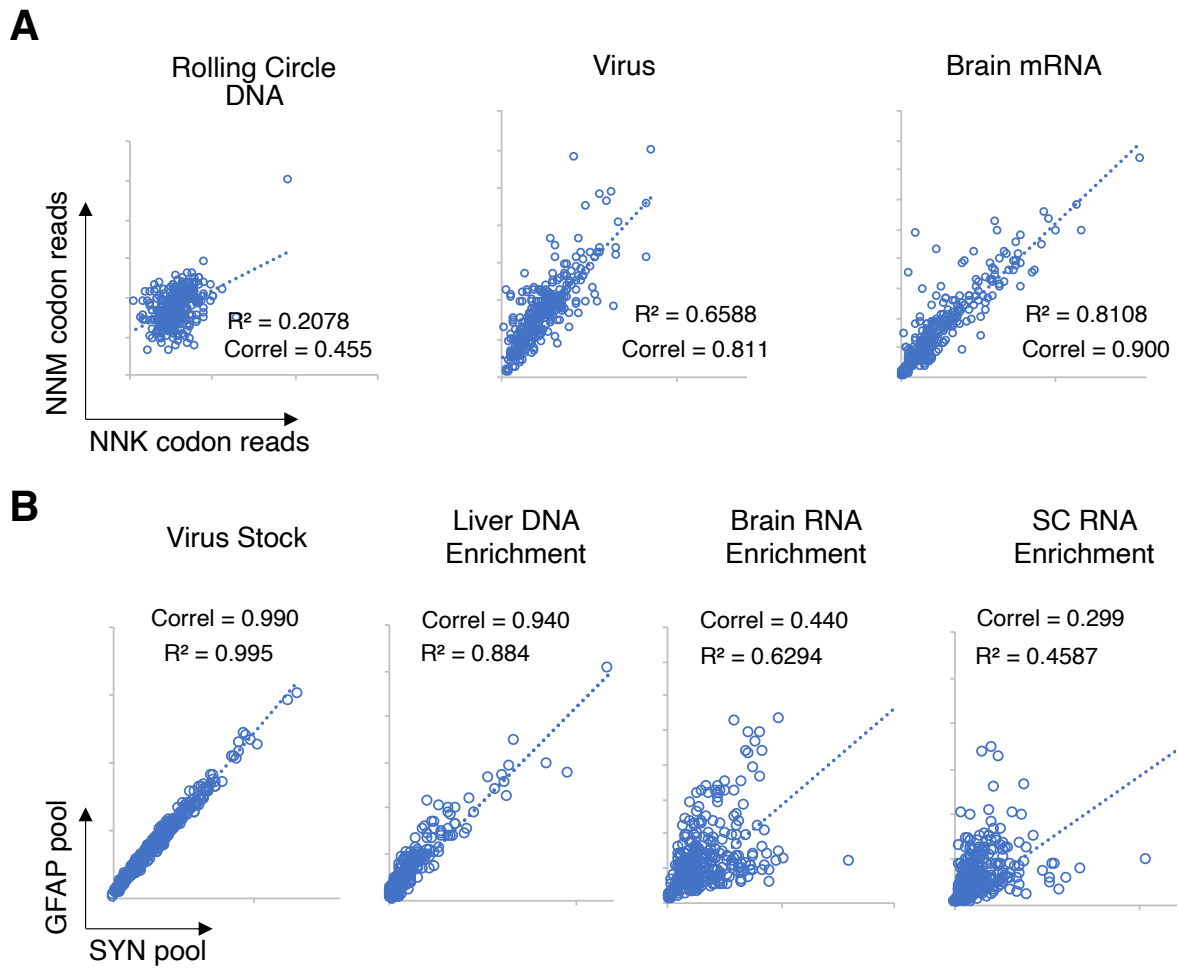

**Figure S3 . Correlation analysis of synthetic pooled library.**

(A) Codon variant correlation. Scatter plots indicate normalized NGS reads from NNM codon variants (Y axis) and NNK codon variants (X axis) of each capsid mutant in the Rolling circle DNA (left), the virus preparation (middle) and the brain mRNA samples recovered from C57Bl/6 mice (right). Both axes are in linear scale. (B) Correlation analysis of SYN- and GFAP-driven capsid pools in the virus stock, liver DNA, brain RNA and spinal cord RNA. Both axes are in linear scale. Note the high correlation in liver DNA suggesting consistency of both libraries.

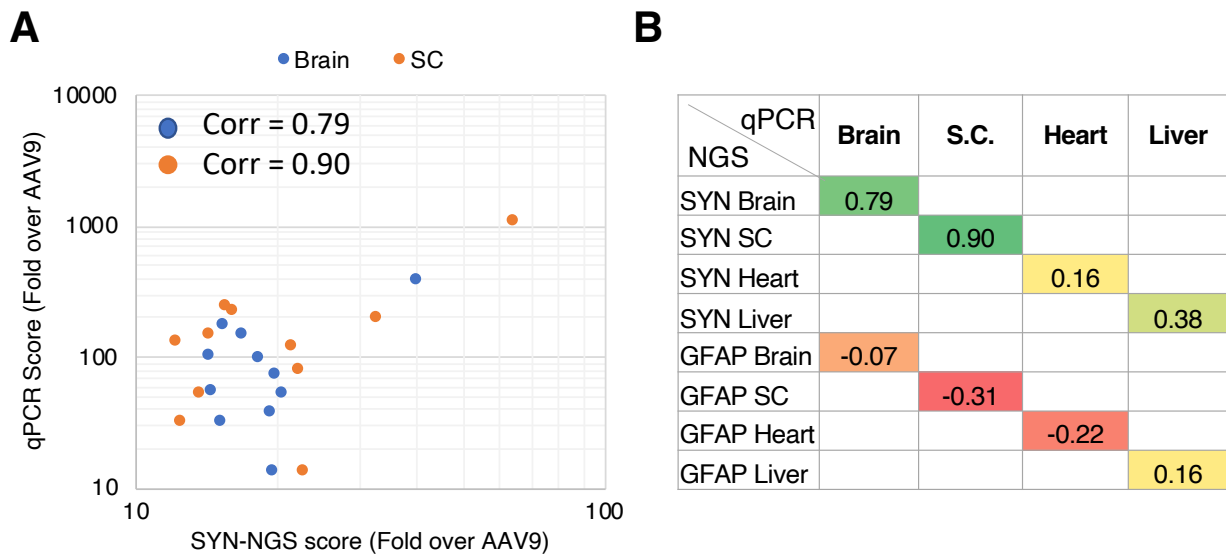

**Figure S4. Correlation analysis between multiplexed NGS analysis and individual capsid qPCR quantitation.** (A) Scatter plot showing the score of each capsid variant as measured by multiplexed brain RNA enrichment (X axis) or individual qPCR RNA quantitation (Y axis) in the brain (blue dots) and spinal cord (orange dots). Values from both assays are normalized to AAV9 for consistency. The correlation coefficients are indicated. (B) Correlation coefficients between qPCR data (rows) and SYN- or GFAP-driven NGS data (columns) of 12 capsids (10 candidates + PHP.eB + AAV9) in the brain, spinal cord, heart and liver. Note the high correlation coefficient obtained with the SYN-driven TRACER data.

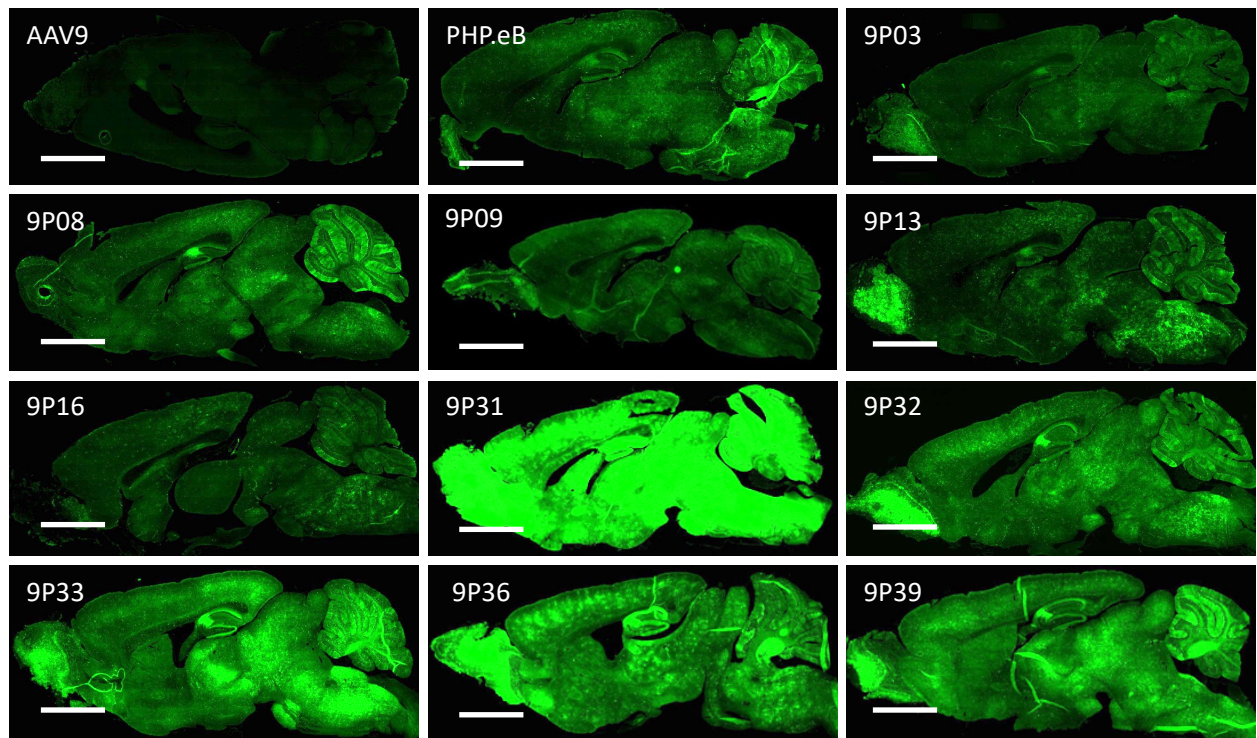

**Figure S5. General brain transduction profile of TRACER capsid candidates after intravascular infusion in adult mice.**

Native EGFP fluorescence was observed in sagittal cryosections from the brain of adult C57Bl/6 mice 28 days after dosing with  $4 \times 10^{11}$  VG per mouse. Bar: 2 mm.

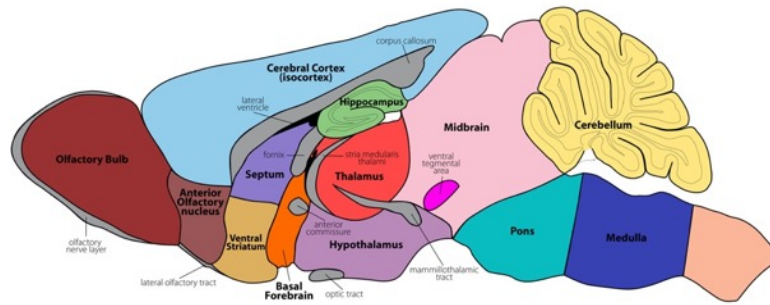

9P13

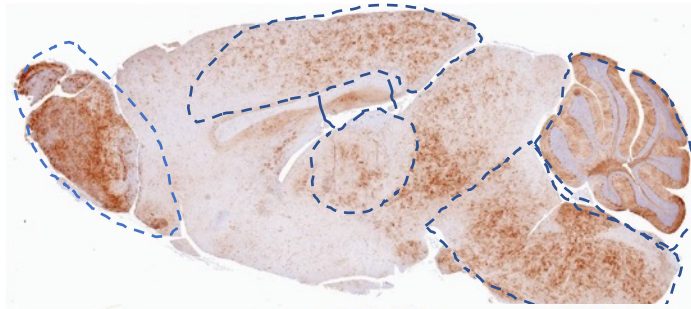

9P16

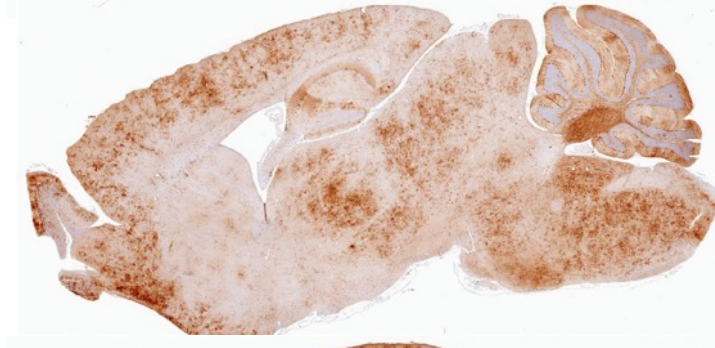

9P31

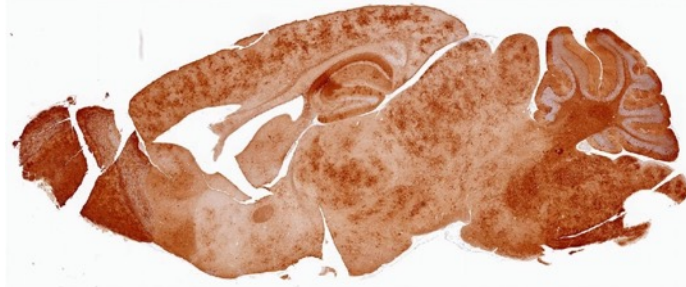

9P33

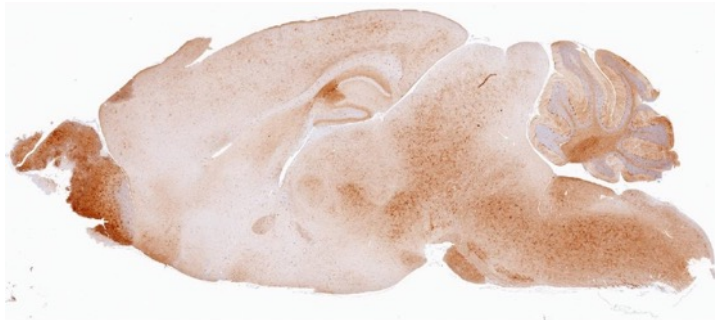

**Figure S6. Representative pattern of transduction by TRACER capsids in mouse brain.**

EGFP IHC from mouse brains 28 days after intravascular infusion with 9P13, 9P31 and 9P33 capsids (4e11VG per mouse). Major brain regions are depicted in the top diagram (image from <http://www.gensat.org>).

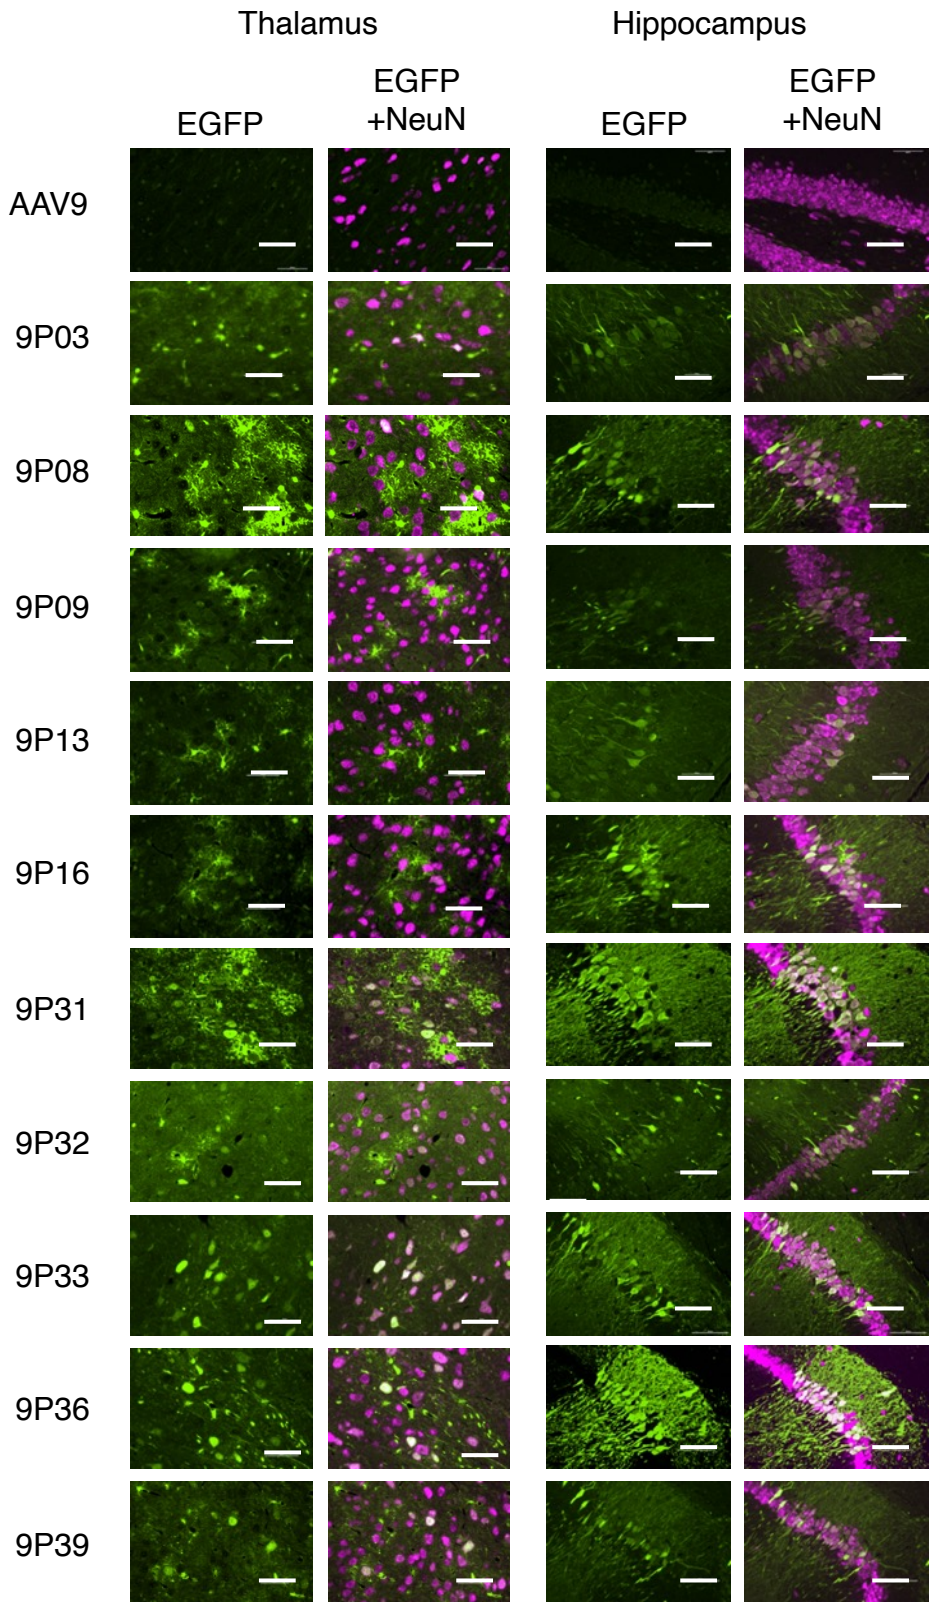

**Figure S7. Neuron transduction by TRACER capsids in mouse Thalamus and Hippocampus.**  
 Co-immunostaining of EGFP (green) and NeuN (magenta) in the brain of mice one month after intravenous dosing with  $4 \times 10^{11}$  VG of engineered capsids. Bar: 50  $\mu$ m.



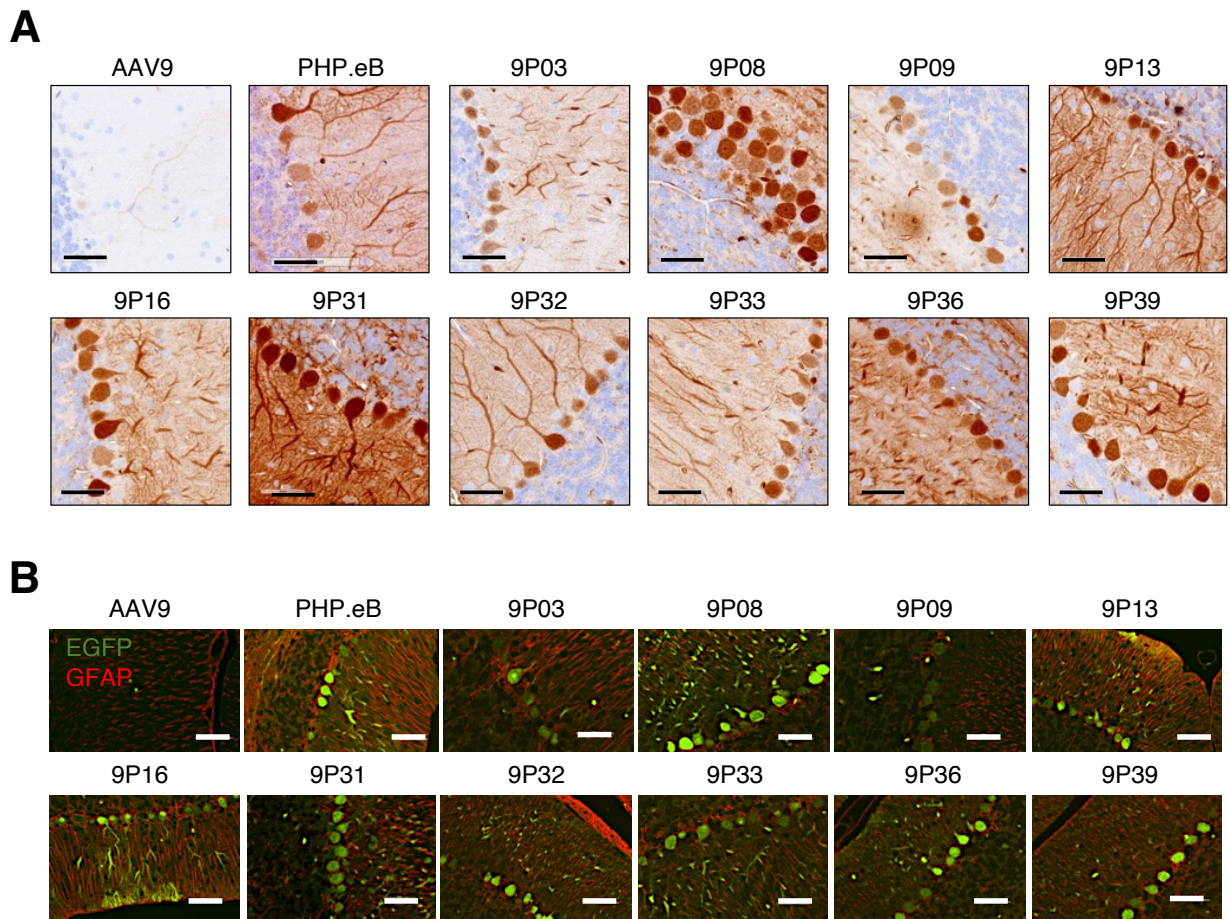

**Figure S8. Transduction by TRACER capsids in mouse cerebellum.**

(A) Detail of EGFP immunostaining in mouse cerebellum 28 days after intravascular infusion ( $4 \times 10^{11}$  VG per mouse).

(B) Co-immunostaining of EGFP (green) and GFAP (red) in the cerebellum. Bar, 50  $\mu$ m.

**Supplemental Table 1. Primers and probes used in this study**

| Primer name                   | Primer sequence (5' to 3')                                                                                                                                                                                                                                                                                                                                                                                                                                                             |
|-------------------------------|----------------------------------------------------------------------------------------------------------------------------------------------------------------------------------------------------------------------------------------------------------------------------------------------------------------------------------------------------------------------------------------------------------------------------------------------------------------------------------------|
| 9L8-F24                       | CAAGTGGCCACAAACCACCAGAGTgccc <del>aa</del> NNKNNKNNKNNKNNKNNKNNKGCACAGGCGCAGACCGGCTG                                                                                                                                                                                                                                                                                                                                                                                                   |
| 9DGL8-F24                     | CAAGTGGCCACAAACCACCAGAGTgatggcNNKNNKNNKNNKNNKNNKNNKGCACAGGCGCAGACCGGCTG                                                                                                                                                                                                                                                                                                                                                                                                                |
| 9DRTL8-F24                    | CAAGTGGCCACAAACCACCAGAGTgatggcaccNNKNNKNNKNNKNNKNNKNNKGCACAGGCGCAGACCGGCTG                                                                                                                                                                                                                                                                                                                                                                                                             |
| CAP9-L8F                      | CAAGTGGCCACAAACCACCAGAGT                                                                                                                                                                                                                                                                                                                                                                                                                                                               |
| CAP9-StopR23                  | CGGTTTATTGATTAACAATCGATTACAGATTACGAGTCAGGTATC                                                                                                                                                                                                                                                                                                                                                                                                                                          |
| CAP9L8<br>gBlock <sup>a</sup> | GCACAGGCGCAGACCGGCTGGGTTCAAAACCAAGGAATACCTCCGGGTATGGTTTGGCAGGACAGAGATGTGTACCTGCAAGGACC<br>CATTTGGGCCAAAAATTCCTCACACGGACGGCAACTTTCACCTTCTCCGCTGATGGGAGGGTTTGGAAATGAAGCACCCGCCTCCTC<br>AGATCCTCATCAAAAAACACACCTGTACCTGCcGATCCTCCAACGGCCTTCAACAAGGACAAGCTGAACTCTTTCATCACCAGTAT<br>TCTACTGGCCAAGTCAGCGTGGAGATCGAGTGGGAGCTGCAGAAGGAAAAACAGCAAGCGgTGGAAACCCGGAGATCCAGTACACTTC<br>CAACTATTACAAGTCTAATAATGTTGAATTTGCTGTTAATACTGAAGGTGTATATAGTGAACCCCGCCCATTTGGCACCAGATACC<br>TGACTCGTAATCTGTAA |
| ΔBamHI                        |                                                                                                                                                                                                                                                                                                                                                                                                                                                                                        |
| ΔAfeI                         |                                                                                                                                                                                                                                                                                                                                                                                                                                                                                        |
| SpliceF6 <sup>b</sup>         | GTGCCAAGAGTGAC/CTCCTG                                                                                                                                                                                                                                                                                                                                                                                                                                                                  |
| CAP-RT                        | GAAACGAATTAACCGTTTATTGATTAACAATCGATTA                                                                                                                                                                                                                                                                                                                                                                                                                                                  |
| 9*NGS-F4N                     | AATGATACGGCGACCACCGAGATCTACACTCTTTCCCTACACGACGCTCTTCCGATCTNNNNTTGGCCACAAACCACCAGAGT                                                                                                                                                                                                                                                                                                                                                                                                    |
| 9*NGS-F3N                     | AATGATACGGCGACCACCGAGATCTACACTCTTTCCCTACACGACGCTCTTCCGATCTNNNNTTGGCCACAAACCACCAGAGT                                                                                                                                                                                                                                                                                                                                                                                                    |
| 9*NGS-F2N                     | AATGATACGGCGACCACCGAGATCTACACTCTTTCCCTACACGACGCTCTTCCGATCTNNTTGGCCACAAACCACCAGAGT                                                                                                                                                                                                                                                                                                                                                                                                      |
| 9*NGS-R <sup>c</sup>          | CAAGCAGAAGACGGCATAACGAGAT (nnnnnn)GTGACTGGAGTTCAGACGCTGTCTTCCGATCTTGGTTTGAACCCAGCCGGT                                                                                                                                                                                                                                                                                                                                                                                                  |
| REP-Fwd2                      | TTTCCGGTGGGCAAAGG                                                                                                                                                                                                                                                                                                                                                                                                                                                                      |
| REP-Rev2                      | GCTCACTTATATCTGCGTCACT                                                                                                                                                                                                                                                                                                                                                                                                                                                                 |
| REP-Probe                     | ACGTGGTTGAGGTGGAGCATGAAT                                                                                                                                                                                                                                                                                                                                                                                                                                                               |
| GloX4-F                       | GGGAACGGTGCATTGGAA                                                                                                                                                                                                                                                                                                                                                                                                                                                                     |
| GloX4-R                       | GATGGCCAGCACACAG                                                                                                                                                                                                                                                                                                                                                                                                                                                                       |
| GloX4-Probe <sup>b</sup>      | AAGAGTGAC/CTCCTGGGCAACG                                                                                                                                                                                                                                                                                                                                                                                                                                                                |
| EGFP                          | Life Technologies Mr04329676_mr Taqman set                                                                                                                                                                                                                                                                                                                                                                                                                                             |
| Mouse TBP                     | Life Technologies Mm01277042_m1 Taqman set                                                                                                                                                                                                                                                                                                                                                                                                                                             |
| Human GAPDH                   | Life Technologies Hs01922876_u1 Taqman set                                                                                                                                                                                                                                                                                                                                                                                                                                             |
| Mouse TERT                    | Life Technologies Mm00653609_cn Taqman set                                                                                                                                                                                                                                                                                                                                                                                                                                             |

<sup>a</sup>Silent mutations have been introduced to remove BamHI and AfeI sites

<sup>b</sup>Specific for CMV-Globin Exon-Exon junction, does not work on DNA

<sup>c</sup>Bracketed 6-mer represents the site if insertion of illumina TruSeq index for multiplexing

## VECTOR SEQUENCES

TRACER-SYN-9-BsrGI (6827bp)

### Features:

17-161: Left ITR  
207-763: Human Synapsin 1 promoter  
784-1349: CMV-Globin hybrid intron  
1372-1857: AAV2 REP C-terminal sequence  
1875-3631: AAV9 CAP Fragment  
3632-3637: BsrGI restriction site  
3762-3906: Right ITR  
4008-4063: TelN recognition sequence  
4718-5575: Ampicillin Resistance  
6577-6632: TelN recognition sequence

```
CCTTAATTAGGCTAGCTTGGCCACTCCCTCTCTGCGCGCTCGCTCGCTCACTGAGGCCGGGGCACCACAAAGGTCGCCC
GACGCCCGGGCTTTGCCCGGGCGGCCTCAGTGAGCGAGCGAGCGCGCAGAGAGGGAGTGGCCAACCTCCATCACTAGG
GGTTCCTGGAGGGGTGGAGTCGTGACGATATCCATGCGTGCACATAACCGCTTAGTATCTGCAGAGGGCCCTGCCTA
TGAGTGCAAGTGGGTTTTAGGACCAGGATGAGGCGGGGTGGGGGTGCCTACCTGACGACCGACCCCGACCCACTGGA
CAAGCACCCAACCCCAATTCCCAAAATTGCGCATCCCTATCAGAGAGGGGGAGGGGAAACAGGATGCGGCGAGGGCG
CGTGCGCACTGCCAGCTTCAGCACCGCGGACAGTGCCTTCGCCCCCGCCTGGCGGGCGCGCCACCGCCGCTCAGC
ACTGAAGGCGCGCTGACGTCCTCGCCGGTCCCCGCAAACCTCCCTTCCCGGCCACCTTGGTCGCGTCCGCGCCGC
CGCCGGCCAGCCGGACCGCACCACGCGAGGCGCGAGATAGGGGGGCACGGGCGCGACCATCTGCGCTGCGGGCGCCG
GCGACTCAGCGCTGCCTCAGTCTGCGGTGGGCAGCGGAGGAGTCGTGTCTGCTGAGAGCGCAGCTGTGCTCCTGG
GCACCGCGCAGTCCGCCCCCGGGTCTCTGGCCAGACCACCCCTAGGACCCCTGCCCAAGTCGCAGCCAAAGCTTC
GTTTAGTGAACCGTCAGATCGCCTGGAGACGCCATCCACGCTGTTTTGACCTCCATAGAAGACACCGGGACCGATCC
AGCCTCCGCGGATTCGAATCCCGCCGGGAACGGTGCATTGGAACGCGGATTCCTCCGTGCCAAGAGTGACGTAAGTA
CCGCTATAGAGTCTATAGGCCACAAAAAATGCTTCTCTTTAATATACTTTTTTGTATTATCTTATTTCTAATA
CTTTCCCTAATCTCTTTCTTTTCAGGGCAATAATGATACAATGATCATGCCTCTTTGCACCATCTAAAGAATAACA
GTGATAATTTCTGGGTTAAGGCAATAGCAATATTTCTGCATATAAAATATTTCTGCATATAAAATGTAAGTATGTA
GAGGTTTCATATTGCTAATAGCAGCTACAATCCAGCTACCATTCTGCTTTTTATTTTATGGTTGGGATAAGGCTGGAT
TATTCTGAGTCCAAGCTAGGCCCTTTTGCTAATCATGTTTCATACCTCTTATCTTCTCCACAGCTCCTGGGCAACG
TGCTGGTCTGTGTGCTGGCCCATCACTTTGGCAAAGAATTGGGATTCGAACCGGTCGCCACCGGTCACCAAGCAGGA
AGTCAAAGACTTTTTCCGGTGGGCAAAGGATCACGTGGTTGAGGTGGAGCATGAATTCTACGTCAAAAAGGGTGGAG
CCAAGAAAAGACCCGCCCCAGTGACGCAGATATAAGTGAGCCCAAACGGGTGCGCGAGTCAGTTGCGCAGCCATCG
ACGTGACGCGGAAGCTTCGATCAACTACGCGGACAGGTACCAAAACAAATGTTCTCGTCACGTGGGCATGAATCT
GATGCTGTTTTCCCTGCAGACAATGCGAGAGACTGAATCAGAATTCAAATATCTGCTTCACTCACGGTGTCAAAGACT
GTTTAGAGTGCTTTCCCGTGTGAGAATCTCAACCCGTTTCTGTGCTCAAAAAGGCGTATCAGAACTGTGCTACATT
CATCACATCATGGGAAAGGTGCCAGACGCTTGCACTGCTTGCGACCTGGTCAATGTGGACTTGGATGACTGTGTTTC
TGAACAATAAATGACTTAAACCAGGTATGGCTGCCGATGGTTATCTTCCAGATTGGCTCGAGGACAACCTTAGTGAA
GGAATTCGCGAGTGGTGGCTTTGAAACCTGGAGCCCTCAACCCAAGGCAAAATCAACAACATCAAGACAACGCTCG
AGGTCTTGTGCTTCCGGTTACAAATACCTTGGACCCGGCAACGGACTCGACAAGGGGGAGCCGGTCAACGCAGCAG
ACGCGGCGGCCCTCGAGCACGACAAGGCTTACGACCAGCAGCTCAAGGCCGGAGACAACCCGTACCTCAAGTACAAC
CACGCCGACGCCGAGTTCCAGGAGCGGCTCAAAGAAGATACGTCTTTTGGGGCAACCTCGGGCGAGCAGTCTTCCA
GGCCAAAAGAGGCTTCTTGAACCTCTTGGTCTGGTTGAGGAAGCGGCTAAGACGGCTCCTGGAAAGAAGAGGCCTG
TAGAGCAGTCTCCTCAGGAACCGGACTCCTCCGCGGGTATTGGCAAATCGGGTGCACAGCCCGCTAAAAAGAGACTC
AATTTCCGTCAGACTGGCGACACAGAGTCAGTCCAGACCCTCAACCAATCGGAGAACCTCCCGCAGCCCCCTCAGG
TGTGGGATCTCTTACAATGGCTTCCAGGTGGTGGCGCACCAGTGGCAGACAATAACGAAGGTGCCGATGGAGTGGGTA
GTTCTCAGGAAATGGCATTGCGATTCCCAATGGCTGGGGGACAGAGTCATCACCACCAGCACCCGAACCTGGGCC
CTGCCACCTACAACAATCACCTCTACAAGCAAATCTCCAACAGCACATCTGGAGGATCTTCAAATGACAACGCCTA
CTTCGGCTACAGCACCCCTGGGGGATTTTTGACTTCAACAGATTCCACTGCCACTTCTCACCACGTGACTGGCAGC
GACTCATCAACAACAACCTGGGGATTCGGCCTAAGCGACTCAACTTCAAGCTCTTCAACATTCAGGTCAAAGAGGTT
ACGGACAACAATGGAGTCAAGACCATCGCAATAACCTTACCAGCAGCTCCAGGTCTTCCAGGTCTTCCAGGTATCA
GCTCCCGTACGTGCTCGGGTCCGCTCACGAGGGTCCCTCCCGCGTTCAGCGGACGTTTTTCATGATTTCTCAGT
ACGGGTATCTGACGCTTAATGATGGAAGCCAGGCCGTGGGTGCTTCTGCTCTTTTACTGCCTGGAATATTTCCCGTCG
CAAATGCTAAGAACGGGTAACAACCTTCCAGTTTCCAGTACGAGTTTGGAGAAGCTACCTTTCCATAGCAGCTACGCTCA
CAGCCAAAGCCTGGACCGACTAATGAATCCACTCATCGACCAATACTTGTACTATCTCTCAAAGACTATTAACGGTT
CTGGACAGAATCAACAACGCTAAAATTCAGTGTGGCCGGACCCAGCAACATGGCTGTCCAGGGAAGAACTACATA
CCTGGACCCAGCTACCGACAACAACGTGTCTCAACCACTGTGACTCAAAAACAACAACAGCGAATTTGCTTGGCCTGG
```

AGCTTCTTCTTGGGCTCTCAATGGACGTAATAGCTTGTATGAATCCTGGACCTGCTATGGCCAGCCACAAAGAAGGAG  
AGGACCGTTTTCTTTCCCTTTGTCTGGATCTTTAATTTTTGGCAAACAAGGAAGCTGGAAGAGACAACGTGGATGCGGAC  
AAAGTCATGATAACCAACGAAGAAGAAATTAATACTACTAACCCGGTAGCAACGGAGTCCATGGACAAGTGGCCAC  
AAACCACCAGAGTGTACAATCGATTGTTAATCAATAAACCGTTAATTCGTTTCAGTTGAACTTTGGTCTCTGCGTAT  
TTCTTTCTTATCTAGTTTCCATGGCTACGTAGATAAGTAGCATGGCGGGTTAATCATTAACTACAAGGAACCCCTAG  
TGATGGAGTTGGCCACTCCCTCTCTGCGCGCTCGCTCGCTCACTGAGGCCGGGCGACCAAGGTCGCCCCGACGCCCG  
GGCTTTGCCCGGGCGGCTCAGTGAGCGAGCGAGCGCGAGAGAGGGAGTGGCCAAATGCAATTAACTGGCCGTC  
GTTTTACAACGTCGTGACTGGGAAAACCTGGCGTTACCCAATTAATCGCCTTGCAGCACATCCCCCTTTGCGCAG  
CTGTATCAGCACACAATTGCCCATTTATACGCGCGTATAATGGACTATTGTGTGCTGATAGCGTAATAGCGAAGAGGC  
CCGCACCGATCGCCCTTCCCAACAGTTGCGCAGCCTGAATGGCGAATGGGACGCGCCCTGTAGCGGCGCATTAAAGCG  
CGGCGGGTGTGGTGGTTACGCGCAGCGTGACCGCTACACTTGCCAGCGCCCTAGCGCCCGCTCCTTTGCGTTTCTTC  
CCTTCCTTTCTCGCCACGTTTCGCCGGCTTTCCCGTCAAGCTCTAAATCGGGGGCTCCCTTTAGGGTTCCGATTTAG  
TGCTTTACGGCACCTCGACCCCAAAAACTTGATTAGGGTGTATGGTTTACGTAAGTGGGCCATCGCCCTGATAGACGG  
TTTTTTCGCCCTTTGACGTTGGAGTCCACGTTCTTTAATAGTGGACTCTTGTTCAAAATGGAACAACACTCAACCCT  
ATCTCGGTCTATTCTTTTGTATTTATAAGGGATTTTGGCGATTTGCGCCTATTGGTTAAAAAATGAGCTGATTTAACA  
AAAATTTAACGCGAATTTTAAACAAAATATTAACGCTTACAATTTAGGTGGCACTTTTCGGGAAATGTGCGCGGAAC  
CCCTATTTGTTTTATTTTTCTAAATACATTTCAAATATGTATCCGCTCATGAGACAATAACCCTGATAAATGCTTCAAT  
AATATTGAAAAGGAAGAGTATGAGTATTCAACATTTCCGTGTCGCCCTTATTCCCTTTTTTTCGGGCATTTTTGCCTT  
CCTGTTTTTGTCTCACCCAGAAACGCTGGTGAAAGTAAAAGATGCTGAAGATCAGTTGGGTGCACGAGTGGGTTACAT  
CGAAGTGGATCTCAACAGCGGTAAGATCCTTGAGAGTTTTTCGCCCGAAGAACGTTTTTCCAATGATGAGCACTTTTTA  
AAGTTCTGCTATGTGGCGCGGTATTATCCCGTATTGACGCGGGCAAGAGCAACTCGGTGCGCGCATAACTATTCT  
CAGAATGACTTGGTTGAGTACTCACAGTCACAGAAAAGCATCTTACGGATGGCATGACAGTAAGAGAATTATGCAG  
TGCTGCCATAACCATGAGTGATAACACTGCGGCCAATTTACTTCTGACAACGATCGGAGGACCGAAGGAGCTAACCG  
CTTTTTTGCACAACATGGGGGATCATGTAACCTCGCCTTGATCGTTGGGAACCGGAGCTGAATGAAGCCATAACAAAC  
GACGAGCGTGACACCACGATGCCTGTAGCAATGGCAACAACGTTGCGCAAACTATTAACTGGCGAACTACTTACTCT  
AGCTTCCCGGCAACAATTAATAGACTGGATGGAGGCGGATAAAGTTGCAGGACCCTTCTGCGCTCGGCCCTTCCGG  
CTGGCTGGTTTTATTGCTGATAAATCTGGAGCCGGTGAGCGTGGGTCTCGCGGTATCATTGCAGCACTGGGGCCAGAT  
GGTAAGCCCTCCCGTATCGTAGTTATCTACACGACGGGGAGTCAGGCAACTATGGATGAACGAAATAGACAGATCGC  
TGAGATAGGTGCCCTCACTGATTAAGCATTGGTAACCTGTCAGACCAAGTTTACTCATATATACTTTAGATTGATTAA  
AACTTCATTTTTAATTTAAAAGGATCTAGGTGAAGATCCTTTTTGATAATCTCATGACCAAAATCCCTTAACGTGAG  
TTTTTCGTTCCACTGAGCGTCAGACCCCGTAGAAAAGATCAAAGGATCTTCTTGAGATCCTTTTTTTTTCTGCGCGTAAT  
CTGCTGCTTGCAACAAAAAAACCACCGCTACCAGCGGTGGTTTTGTTTTGCCGGATCAAGAGCTACCAACTCTTTTTTC  
CGAAGGTAACCTGGCTTCAGCAGAGCGCAGATACCAAATACTGTTCTTCTAGTGTAGCCGTAGTTAGGCCACCACTTC  
AAGAACTCTGTAGCACCGCTACATACCTCGCTCTGCTAATCCTGTTACCAGTGGCTGCTGCCAGTGGCGATAAGTC  
GTGTCTTACCGGGTTGGACTCAAGACGATAGTTACCGGATAAGGCGCAGCGGTGCGGCTGAACGGGGGGTTCTGTGCA  
CACAGCCCAGCTTGGAGCGAACGACCTACACCGAACTGAGATACCTACAGCGTGAGCTATGAGAAAGCGCCACGCTT  
CCCGAAGGGGAGAAAGGCGGACAGGTATCCGGTAAGCGGCAGGGTCGGAACAGGAGAGCGCACGAGGGAGCTTCCAGG  
GGGAAACGCCTGGTATCTTTATAGTCTGTGCGGTTTTGCCACCTCTGACTTGAGCGTTCGATTTTTTGTGATGCTCGT  
CAGGGGGGCGGAGCCTATGGAAAAACGCCAGCAACGCGGCCTTTTTACGGTTCTGGCCTTTTGTGCTGGCCTTTTGTCT  
CACATGTTCTTTCTGCGTTATCCCCTGATTCTGTGGATAACCGTATTACCGCCTTTGAGTGGAGCTGATACCGCTCG  
CCGACGCCAAGCAGCCGAGCGCAGCGAGTCAGTGAGCGAGGAAGCGGAAGAGCGCCCAATACGCAAAACCGCTCTCC  
CCGCGCTTGGCCGATTCATTAATGTCTAGATATCAGCACACAATAGTCCATTATACGCGCGTATAATGGGCAATTTG  
TGTGCTGATACAGCTGGCAGCAGAGTTTTCCCGACTGGAAAGCGGGCAGTGAGCGCAACGCAATTAATGTGAGTTAG  
CTCACTCATTAGGCACCCAGGCTTTACACTTTATGCTTCCGGCTCGTATGTTGTGTGGAATTTGTGAGCGGATAACA  
ATTTTACACAGGAAACAGCTATGACCATGATTACGCCAGATTTAATTAAGG

TRACER-GFAP-9-BsrGI (6827bp)

Features:

- 17-161: Left ITR
- 207-905: GFAbclD promoter
- 926-1491: CMV-Globin hybrid intron
- 1514-2000: AAV2 REP C-terminal sequence
- 2017-3773: AAV9 CAP Fragment
- 3774-3779: BsrGI restriction site
- 3904-4048: Right ITR
- 4150-4205: TelN recognition sequence
- 4860-5720: Ampicillin Resistance
- 6719-6774: TelN recognition sequence

CCTTAATTAGGCTAGCTTGGCCACTCCCTCTCTGCGCGCTCGCTCGCTCACTGAGGCCGGGGCACCAAAGGTCGCCC  
GACGCCCCGGGCTTTGCCCGGGCGGCTCAGTGAGCGAGCGAGCGCGAGAGAGGGAGTGGCCAACCTCCATCACTAGG  
GGTTCCTGGAGGGGTGGAGTCTGTGACGATATCCATGCGTGCACATAACCGGTGATCTAACATATCTGGTGTGGAGT  
AGCGGACGCTGCTATGACAGAGGCTCGGGGGCCTGAGCTGGCTCTGTGAGCTGGGGAGGAGGCAGACAGCCAGGCC  
TGTCTGCAAGCAGACCTGGCAGCATTGGGCTGGCCGCCCCCAGGGCCTCCTCTTCATGCCCAGTGAATGACTCACC  
TTGGCACAGACACAATGTTCCGGGTGGGCACAGTGCCTGCTTCCCGCCGACCCCGAGCCCCCTCAAATGCCTTCCG  
AGAAGCCCATTGAGCAGGGGGCTTGCATTGCACCCCAGCCTGACAGCCTGGCATCTTGGGATAAAAGCAGCACAGCC  
CCCTAGGGGCTGCCCTTGCTGTGTGGCGCCACCGGCGGTGGAGAACAAGGCTCTATTTCAGCCTGTGCCAGGAAAGG  
GGATCAGGGGATGCCCAGGCATGGACAGTGGGTGGCAGGGGGGAGAGGAGGGCTGTCTGCTTCCAGAAGTCCAAG  
GACACAAATGGGTGAGGGGAGAGCTCTCCCATAGCTGGGCTGCGGCCAACCCACCCCTCAGGCTATGCCAGGG  
GGTGTGGCCAGGGGCACCCGGGCATCGCCAGTCTAGCCACTCCTTCATAAAGCCCTCGCATCCAGGAGCGAGCAG  
AGCCAGAGCAGGTTGGAGAGGAGACGCATCACCTCCGCTGCTCGCGGGGATCCTCTAGAAGCTTCGTTTAGTGAACC  
GTCAGATCGCCTGGAGACGCCATCCACGCTGTTTTGACCTCCATAGAAGACACCGGGACCGATCCAGCCTCCGCGGA  
TTCGAATCCCCGGGCGGAAACGGTGCATTGGAACCGCGGATTCGCCCGTGCCAAGAGTGCAGTAAGTACCCGCTATAGAG  
TCTATAGCCCCACAAAAAATGCTTTCTTTAATATACTTTTTTGTGTTTATCTTATTTCTAATACTTTCCCTAATC  
TCTTTCTTTTCAGGGCAATAATGATACAATGTATCATGCCTCTTTGCACCATTCTAAAGAATAACAGTGATAAATTTCT  
GGGTTAAGGCAATAGCAATATTTCTGCATATAAATATTTCTGCATATAAATTTGTAAGTGAATGTAAGAGGTTTCATAT  
TGCTAATAGCAGCTACAATCCAGCTACCATTCTGCTTTTTATTTTTATGGTTGGGATAAGGCTGGATTATTCTGAGTCC  
AAGCTAGGCCCTTTTGCTAATCATGTTTCATACCTCTTATCTTCTCCACAGCTCCTGGGCAACGTGCTGGTCTGTG  
TGCTGGCCCATCACTTTGGCAAAGAATTGGGATTGCAACCGGTGCGCACCGGTCACCAAGCAGGAAGTCAAAGACTT  
TTTCCGGTGGGCAAAGGATCACGTGGTTGAGGTGGAGCATGAATTCTACGTCAAAAAGGGTGGAGCCAAGAAAAGAC  
CCGCCCCAGTGACGCAGATATAAGTGAGCCCAAACGGGTGCGCGAGTCAGTTGCGCAGCCATCGACGTCAGACGCG  
GAAGCTTCGATCAACTACGCGGACAGGTACCAAAACAAATGTTCTCGTCACGTGGGCATGAATCTGATGCTGTTTCC  
CTGCAGACAATGCGAGAGACTGAATCAGAATTCAAATATCTGCTTCACTCACGGTGTCAAAGACTGTTTAGAGTGCT  
TTCCCGTGTGAGAATCTCAACCCGTTTCTGTGCTCAAAAAGGCGTATCAGAACTGTGCTACATTATCATCATGAT  
GGAAAGGTGCCAGCGCTTGCCTGCTTGGCAGCTGGTCAATGGGACTTGGATGACTGTGTTTCTGAACAATAAAT  
GACTTAAACCAGGTATGGCTGCCGATGGTTATCTTCCAGATTGGCTCGAGGACAACCTTAGTGAAGGAATTCGCGAG  
TGGTGGGCTTTGAAACCTGGAGCCCTCAACCCAAAGCAAAATCAACAACATCAAGACAACGCTCGAGGACTTTGTGCT  
TCCGGGTTACAAATACCTTGGACCCGGCAACGGACTCGACAAGGGGGAGCCGGTCAACGCAGCAGACGCGGGCC  
TCGAGCACGACAAGGCTACGACCAGCAGCTCAAGGCCGGAGACAACCCGTACCTCAAGTACAACCACGCCGACGCC  
GAGTTCAGGAGCGGCTCAAAGAAGATACGTCTTTTGGGGCAACCTCGGGCGAGCAGTCTTCCAGGCCAAAAAGAG  
GCTTCTTGAACCTCTTGGTCTGGTTGAGGAAGCGGCTAAGACGGCTCCTGGAAAGAAGAGGCTGTAGAGCAGTCTC  
CTCAGGAACCGGACTCCTCCGCGGGTATTGGCAAATCGGGTGCACAGCCCGCTAAAAAGAGACTCAATTTCCGGTCA  
ACTGGCGACACAGAGTCAGTCCAGACCCTCAACCAATCGGAGAACCTCCCGCAGCCCCCTCAGGTGTGGGATCTCT  
TACAATGGCTTCAAGTGGTGGCGCACCAGTGGCAGACAATAACGAAGGTGCCGATGGAGTGGGTAGTTCTCGGGAA  
ATTGGCATTGCGATTCCCAATGGCTGGGGGACAGAGTCATCACCACCAGCACCCGAACCTGGGCCCTGCCACCTAC  
AACAATCACCTCTACAAGCAAAATCTCCAACAGCACATCTGGAGGATCTTCAAATGACAACGCCTACTTCGGGTACAG  
CACCCCTGGGGGATTTTTGACTTCAACAGATTCCACTGCCACTTCTCACCACGTGACTGGCAGCGACTCATCAACA  
ACAACCTGGGGATTCGGCCCTAAGCGACTCAACTTCAAGCTCTTCAACATTCAGGTCAAAGAGGTTACGGCAACAAT  
GGAGTCAAGACCATCGCCAATAACCTTACCAGCAGGTCAGGTCCTCAGGACTCAGACTATCAGCTCCCGTACGCT  
GCTCGGGTCCGCTCACGAGGGCTGCCCTCCCGCGTCCCAGCGGACGTTTTTCATGATTCTCAGTACGGGTATCTGA  
CGCTTAATGATGGAAGCCAGGCCGTGGGTGCTTTCGCTCTTTTACTGCTGGAATATTTCCCGTGCAGAAATGCTAAGA  
ACGGGTAACAACCTTCCAGTTCAGCTACGAGTTTGGAGAAGCTACCTTTCCATAGCAGCTACGCTCACAGCCAAAGCCT  
GGACCGACTAATGAATCCACTCATCGACCAATACTTGTACTATCTCTCAAAGACTATTAACGGTTCTGGACAGAATC  
AACAAACGCTAAAATTCAGTGTGGCCGGACCCAGCAACATGGCTGTCCAGGGAAGAACTACATACTGGACCCAGC  
TACCGACAACAACGTGTCTCAACCACTGTGACTCAAAAACAACAACAGCGAATTTGCTTGGCCTGGAGCTTCTTCTTG

GGCTCTCAATGGACGTAATAGCTTGTATGAATCCTGGACCTGCTATGGCCAGCCACAAAGAAGGAGAGGACCGTTTCT  
TTCCTTTGTCTGGATCTTTAATTTTTGGCAAACAAGGAACCTGGAAGAGACAACGTGGATGCGGACAAAGTCATGATA  
ACCAACGAAGAAGAAATTAATACTAACCCTGAGCAACGGAGTCTATGGACAAGTGGCCACAAACCACAGAG  
TGTACATCGATTGTTAATCAATAAACCGTTAATTCGTTTCAGTTGAACCTTTGGTCTCTGCGTATTTCTTTCTTATC  
TAGTTTTCCATGGCTACGTAGATAAGTAGCATGGCGGGTTAATCATTAACTACAAGGAACCCCTAGTGATGGAGTTGG  
CCACTCCCTCTCTGCGCGCTCGCTCGCTCACTGAGGCCGGGCGACCAAGGTCGCCCGACGCCCGGGCTTTGCCCGG  
GCGGCTCAGTGAGCGAGCGAGCGCGAGAGGGAGTGGCCAAGCATGCAATTAACCTGGCCGTCGTTTTACAACGT  
CGTGACTGGGAAAACCTGGCGTTACCCAACCTAATCGCCTTGCAGCACATCCCCCTTTGCGCAGCTGTATCAGCAC  
ACAATTGCCCATTTATACGCGCGTATAATGGACTATTGTGTGTGATAGCGTAATAGCGAAGAGGCCCGCACCCGATCG  
CCCTTCCCAACAGTTGCGCAGCCTGAATGGCGAATGGGACGCGCCCTGTAGCGGCGCATTAAAGCGCGGGCGGGTGTGG  
TGTTTACGCGCAGCGTGACCGCTACACTTGCCAGCGCCCTAGCGCCCGCTCCTTTTCGCTTTCTTCCCTTCCCTTCTC  
GCCACGTTTCGCCGGCTTTCCCGTCAAGCTCTAAATCGGGGGCTCCCTTTAGGGTTCGGATTTAGTGCTTTACGGCA  
CCTCGACCCCAAAAACTTGATTAGGGTGTATGGTTCACGTAGTGGGCCATCGCCCTGATAGACGGTTTTTTCGCCCTT  
TGACGTTGGAGTCCACGTTCTTTAATAGTGGACTCTTGTTCCAAACCTGGAACAACACTCAACCCTATCTCGGTCTAT  
TCTTTTGTATTTATAAGGGATTTTGGCGATTTTCGGCCTATTGGTTAAAAAATGAGCTGATTTAACAAAAATTTAACGC  
GAATTTTAAACAAAATATTAACGCTTACAATTTAGTGGCACTTTTCGGGAAATGTGCGCGGAACCCCTATTGTCTT  
ATTTTTCTAAATACATTTCAAATATGTATCCGCTCATGAGACAATAACCCTGATAAATGCTTCAATAATATTGAAAA  
GGAAGAGTATGAGTATTCAACATTTCCGTGTCGCCCTTATTCCCTTTTTTTCGGCATTTCCTTCTGTTTTTGTCT  
CACCCAGAAACGCTGGTGAAAGTAAAAGATGCTGAAGATCAGTTGGGTGCACGAGTGGGTTACATCGAACTGGATCT  
CAACAGCGGTAAGATCCTTGAGAGTTTTTCGCCCGAAGAACGTTTTTCCAATGATGAGCACTTTTAAAGTTCTGCTAT  
GTGGCGCGGTATTATCCCGTATTGACGCCGGGCAAGAGCAACTCGGTGCGCGCATACTATTCTCAGAATGACTTG  
GTTGAGTACTCACAGTACAGAAAAGCATCTTACGGATGGCATGACAGTAAGAGAATTATGCAGTGTGCCATAAC  
CATGAGTGATAACACTGCGGCCAACTTACTTCTGACAACGATCGGAGGACCGAAGGAGCTAACCGCTTTTTTGCACA  
ACATGGGGGATCATGTAACCTCGCCTTGATCGTTGGGAACCGGAGCTGAATGAAGCCATACCAAACGACGAGCGTGAC  
ACCACGATGCCTGTAGCAATGGCAACAACGTTGCGCAAACTATTAACCTGGCGAACTACTTACTCTAGCTTCCCGGCA  
ACAATTAATAGACTGGATGGAGGCGGATAAAAGTTGCAGGACCCTTCTGCGCTCGGCCCTTCCGGCTGGCTGGTTTTA  
TTGCTGATAAATCTGGAGCCGGTGAGCGTGGGTCTCGCGGTATCATTGCAGCACTGGGGCCAGATGGTAAGCCCTCC  
CGTATCGTAGTTATCTACAGGACGGGGAGTCAGGCAACTATGGATGAACGAAATAGACAGATCGCTGAGATAGGTGC  
CTCACTGATTAAGCATTGGTAACTGTGACACCAAGTTTACTCATATATACTTTAGATTGATTTAAAACCTTCATTTTT  
AATTTAAAAGGATCTAGGTGAAGATCCTTTTTGATAATCTCATGACCAAAATCCCTAACGTGAGTTTTTCGTTCCAC  
TGAGCGTCAGACCCCGTAGAAAAGATCAAAGGATCTTCTTGAGATCCTTTTTTTCTGCGCGTAATCTGCTGCTTGCA  
AACAAAAAAACCACCGCTACCAGCGGTGGTTTTGTTTTGCCGGATCAAGAGCTACCAACTCTTTTTCCGAAGGTAACCTG  
GCTTCAGCAGAGCGCAGATACCAAATACTGTTCTTCTAGTGTAGCCGTAGTTAGGCCACCACTTCAAGAACTCTGTA  
GCACCGCTACATACCTCGCTCTGCTAATCCTGTTACCAGTGGCTGCTGCCAGTGGCGATAAGTCGTGTCTTACCGG  
GTTGGACTCAAGACGATAGTTACCGGATAAGGCGCAGCGGTGCGGCTGAACGGGGGGTTTCGTGCACACAGCCAGCT  
TGGAGCGAACGACCTACACCGAACTGAGATACCTACAGCGTGAGCTATGAGAAAGCGCCACGCTTCCCGAAGGGAGA  
AAGGCGGACAGGTATCCGGTAAGCGGCAGGGTCGGAACAGGAGAGCGCACGAGGGAGCTTCCAGGGGGAAACGCCTG  
GTATCTTTATAGTCTGTGCGGTTTTGCCACCTCTGACTTGAGCGTCGATTTTTTGTGATGCTCGTCAGGGGGGCGGA  
GCCTATGGAAAAACGCCAGCAACGCGGCCTTTTTACGGTTCCTGGCCTTTTGTGCTGGCCTTTTGTCTCACATGTTCTTT  
CCTGCGTTATCCCCTGATTCTGTGGATAACCGTATTACCGCCTTTGAGTGAGCTGATACCGCTCGCCGAGCCGAAC  
GACCGAGCGCAGCGAGTCAGTGAGCGAGGAAGCGGAAGAGCGCCCAATACGCAAACCGCCTCCTCCCGCGCGTTGGC  
CGATTCATTAATGTCTAGATATCAGCACACAATAGTCCATTATACGCGCGTATAATGGGCAATTGTGTGTGATACA  
GCTGGCACGACAGGTTTTCCGACTGGAAAGCGGGCAGTGAGCGCAACGCAATTAATGTGAGTTAGCTCACTCATTAG  
GCACCCAGGCTTTACACTTTATGCTTCCGGCTCGTATGTTGTGTGGAATTGTGAGCGGATAACAATTTACACACAGG  
AAACAGCTATGACCATGATTACGCCAGATTTAATTAAGG

pREP-3stop

Features:

- 68-1933: AAV2 REP ORF
- 1950-3703: AAV9 CAPA Fragment
- 1965-1967: Premature VP1 stop codon
- 2376-2378: Premature VP2 stop codon
- 2595-2597: Premature VP3 stop codon
- 3520-3525: MscI restriction site
- 5207-6067: Ampicillin Resistance

GTCGACGGTATCGGGGGAGCTCGCAGGGTCTCCATTTTGAAGCGGGAGGTTTGAACGCGCAGCCGCCATGCCGGGGT  
TTTACGAGATTGTGATTAAGGTCCCAGCGACCTTGACGAGCATCTGCCCGGCATTTCTGACAGCTTTGTGAACTGG  
GTGGCCGAGAAGGAATGGGAGTTGCCGCCAGATTCTGACATGGATCTGAATCTGATTGAGCAGGCACCCCTGACCGT  
GGCCGAGAAGCTGCAGCGCGACTTTCTGACGGAATGGCGCCGTGTGAGTAAGGCCCGGAGGCTCTTTTCTTTGTGC  
AATTTGAGAAGGGGAGAGAGCTACTTCCACATGCACGTGCTCGTGGAAACCACCGGGGTGAAATCCATGGTTTTGGGA  
CGTTTCTCTGAGTCAGATTCCGCGAAAAACTGATTTCAGAGAATTTACCGCGGGATCGAGCCGACTTTGCCAAACTGGTT  
CGCGGTACAAAAGACCAGAAATGGCGCCGGAGCCGGAACAAGGTGGTGGATGAGTGCTACATCCCAAACTTACTTGC  
TCCCCAAAACCCAGCCTGAGCTCCAGTGGGCGTGGACTAATATGGAACAGTATTTAAGCGCCTGTTTGAATCTCACG  
GAGCGTAAACGGTTGGTGGCGCAGCATCTGACGCACGTGTGCGAGACGCAGGAGCAGAACAAGAGAATCAGAATCC  
CAATTCTGATGCGCCGGTGTATCAGATCAAAAACTTCAGCCAGGTACATGGAGCTGGTTCGGGTGGCTCGTGGACAAGG  
GGATTACCTCGGAGAAGCAGTGGATCCAGGAGGACCAGGCCTCATACATCTCCTTCAATGCGGCCTCCAACCTCGCGG  
TCCCCAAATCAAGGCTGCCTTGGACAATGCGGGAAAGATTATGAGCCTGACTAAAACCGCCCCGACTACCTGGTGGG  
CCAGCAGCCCCTGGAGGACATTTCCAGCAATCGGATTTATAAAAATTTTGGAACTAAACGGGTACGATCCCCAATATG  
CGGCTTCCGTCTTTCTGGGATGGGCCACGAAAAAGTTTCGGCAAGAGGAACACCATCTGGCTGTTTGGGCCTGCAACT  
ACCGGGAAGACCAACATCGCGGAGGCCATAGCCACACTGTGCCCTTCTACGGGTGCGTAAACTGGACCAATGAGAA  
CTTTCCCTTCAACGACTGTGTGCAAGATGGTGTATCTGGTGGGAGGAGGGGAAGATGACCGCCAAGGTCTGTGGAGT  
CGGCCAAAGCCATTCTCGGAGGAAGCAAGGTGCGCGTGGACCAGAAATGCAAGTCTCGGCCCAGATAGACCCGACT  
CCCCGTGATCGTCACTCCAACCAACATGTGCGCCGTGATTGACGGGAACCAACGACCTTCGAACACCCAGCAGCC  
GTTTGCAAGACCGGATGTTCAAATTTGAACCTACCCCGCTGCTGGATCATGACTTTGGGAAGGTACCAACAGCAGGAAG  
TCAAAGACTTTTTCCGGTGGGCAAAGGATCACGTGGTTGAGGTGGAGCATGAATTTCTACGTCAAAGGGGTGGAGCC  
AAGAAAAGACCCGCCCCAGTGACGCAGATATAAGTGAGCCCAAACGGGTGCGCGAGTCAGTTGCGCAGCCATCGAC  
GTCAGACGCGGAAGCTTCGATCAACTACGCGGACAGGTACCAAAAACAAATGTTTCTCGTCACGTGGGCATGAATCTGA  
TGCTGTTTTCCCTGCAGACAATGCGAGAGACTGAATCAGAATTCAAATATCTGCTTCACTCACGGTGTCAAAGACTGT  
TTAGAGTGCTTTCCCGTGTGAGAATCTCAACCCGTTTTCTGTGCTCAAAAAGGCGTATCAGAAACTGTGCTACATTCA  
TCACATCATGGGAAAGGTGCCAGACGCTTGCACCTGCTTGCACCTGGTCAATGTGGACTTGGATGACTGTGTTTTCTG  
AACAATAAATGACTTAAACCAGGTATGGCTGCCGATGGTTAGCTTCCAGATTGGCTCGAGGACAACCTTAGTGAAGG  
AATTCGCGAGTGGTGGGCTTTGAAACCTGGAGCCCTCAACCCAAGGCAAATCAACAACATCAAGACAACGCTCGAG  
GTCTTGTGCTTCCGGGTTACAAATACCTTGGACCCGGCAACGGACTCGACAAGGGGGAGCCGGTCAACGCAGCAGAC  
GCGGCGGCCCTCGAGCACGACAAGGCCTACGACCAGCAGCTCAAGGCCGGAGACAACCCGTACCTCAAGTACAACCA  
CGCCGACGCGGAGTTCCAGGAGCGGCTCAAAGAAGATACGTCTTTTGGGGGCAACCTCGGGCGAGCAGTCTTCCAGG  
CCAAAAGAGGCTTCTTGAACCTCTTGGTCTGGTTGAGGAAGCGGCTAAGACGGCTCCTGGAAAGTAGAGGCCTGTA  
GAGCAGTCTCCTCAGGAACCGGACTCCTCCGCGGATTTGGCAAATCGGGTGCACAGCCCGCTAAAAAGAGACTCAA  
TTTTCGGTGACTGGCGACACAGAGTCAGTCCAGACCCTCAACCAATCGGAGAACCCTCCCGCAGCCCCCTCAGGTG  
TGGGATCTCTTACAATGGCTTTCAGGTGGTGGCGCACCAGTGGCAGACAATAACTTAAAGGTGCCGATGGAGTGGGTAGT  
TCCTCGGGAATTTGGCATTGCGATTCCCAATGGCTGGGGGACAGAGTCATCACCACCAGCACCCGAACCTGGGCCCT  
GCCCACCTACAACAATCACCTCTACAAGCAAATCTCCAACAGCACATCTGGAGGATCTTCAAATGACAACGCCTACT  
TCGGCTACAGCACCCCTGGGGTATTTTACTTCAACAGATTCCACTGCCACTTCTCACCACGTGACTGGCAGCGA  
CTCATCAACAACAACCTGGGGATTCCGGCCTAAGCGACTCAACTTCAAGCTCTTCAACATTCAGGTCAAAGAGGTTAC  
GGACAACAATGGAGTCAAGACCATCGCCAATAACCTTACCAGCACGGTCCAGGTCTTACGGACTCAGACTATCAGC  
TCCCCTACGTGCTCGGGTCCGGTCCAGAGGGTGCCTCCCGCCGTTCCAGCGGACGTTTTTCATGATTCTCAGTAC  
GGGTATCTGACGCTTAATGATGGAAGCCAGGCCGTGGGTGCTTTCGTCTTTTACTGCCTGGAATATTTCCCGTGC  
AATGCTAAGAACGGGTAACAACCTTCCAGTTCAGCTACGAGTTTGGAGAACGTACCTTTCCATAGCAGCTACGCTCACA  
GCCAAAGCCTGGACCCGACTAATGAATCCACTGTATCGACCAATACTTGTACTATCTCTCAAAGACTATTAACGGTTCT  
GGACAGAATCAACAACAGCTAAAATTCAGTGTGCGCCGGACCCAGCAACATGGCTGTCCAGGAAGAAACTACATACC  
TGGACCCAGTACCAGACAACAACGTGTCTCAACCATGTGACTCAAACAACAACAGCAGCAATTTGCTTGGCCTGGAG  
CTTCTTCTTGGGCTCTCAATGGACGTAATAGCTTGTGTAATCCTGGACCTGCTAAGGCCAAGTCAGCGTGGAGATCG  
AGTGGGAGCTGCAGAAGGAAAACAGCAAGCGCTGGAACCCGGAGATCCAGTACACTTCCAACCTATTACAAGTCTAAT  
AATGTTGAATTTGCTGTTAATACTGAAGGTGTATATAGTGAACCCCGCCCCATTGGCACAGATACTGACTCGTAA  
TCTGTAAATTGCTTGTAAATCAATAAACCGTTTAAATTCGTTTTCAGTTGAACTTTGGTCTCTGCGAAGGGCGAATTCGT

TTAAACCTGCAGGACTAGAGTCCTGTATTAGAGGTCACGTGAGTGTTTTGCGACATTTTGGACACCATGTGGTCAC  
GCTGGGTATTTAAGCCCGAGTGAGCACGCAGGGTCTCCATTTTGAAGCGGGAGGTTTGAACGCGCAGCCGCAAGCC  
GAATTTGCAGATATCCATCACACTGGCGGGCGCTCGACTAGAGCGGGCCACCGCGGTGGAGCTCCAGCTTTTGT  
TCCCTTTAGTGAGGGTTAATTGCGCGCTTGGCGTAATCATGGTCATAGCTGTTTCTGTGTGAAATTTGTTATCCGCT  
CACAATTCACACAACATAACGAGCCGGAAGCATAAAGTGTAAGCCTGGGGTGCCTAATGAGTGAGCTAACTCACAT  
TAATTGCGTTGCGCTCACTGCCCGCTTTCCAGTCGGGAAACCTGTCGTGCCAGCTGCATTAATGAATCGGCCAACGC  
GCGGGGAGAGGGGTTTTGCGTATTGGGCGCTCTTCCGCTTCTCGCTCACTGACTCGCTGCGCTCGGTGCTTCCGCT  
GCGGCGAGCGGTATCAGCTCACTCAAAGGCGGTAATACGGTTATCCACAGAATCAGGGGATAACGCAGGAAAGAACA  
TGTGAGCAAAAGGCCAGCAAAAGGCCAGGAACCGTAAAAAGGCCGCGTTGCTGGCGTTTTTCCATAGGCTCCGCCCC  
CCTGACGAGCATCAAAAAATCGACGCTCAAGTCAGAGGTGGCGAAACCCGACAGGACTATAAAGATAACCAGGCGTT  
TCCCCCTGGAAGCTCCCTCGTGCGCTCTCTGTTCCGACCCTGCCGCTTACCGGATACCTGTCCGCCTTTCTCCCTT  
CGGAAGCGTGGCGCTTTCTCATAGCTCACGCTGTAGGTATCTCAGTTCGGTGTAGGTCGTTCCGCTCCAAGCTGGGC  
TGTGTGCACGAACCCCCGTTTCCAGCCCGACCGCTGCGCCTTATCCGGTAACTATCGTCTTGAGTCCAACCCGGTAAG  
ACACGACTTATCGCCACTGGCAGCAGCCACTGGTAACAGGATTAGCAGAGCGAGGTATGTAGGCGGTGCTACAGAGT  
TCTTGAAGTGGTGGCCTAACTACGGCTACACTAGAAGAACAGTATTTGGTATCTGCGCTCTGCTGAAGCCAGTTACC  
TTCGGA AAAAGAGTTGGTAGCTCTTGATCCGGCAAACAAACCACCGCTGGTAGCGGTGGTTTTTTTTGTTTGAAGCA  
GCAGATTACGCGCAGAAAAAAGGATCTCAAGAAGATCCTTTGATCTTTTCTACGGGGTCTGACGCTCAGTGGAACG  
AAAACCTCACGTTAAGGGATTTTTGGTCATGAGATTATCAAAAAGGATCTTACCTAGATCCTTTTAAATTA AAAATGA  
AGTTTTAAATCAATCTAAAGTATATATGAGTAAACTTGGTCTGACAGTTACCAATGCTTAAATCAGTGAGGCACCTAT  
CTCAGCGATCTGTCTATTTTCGTTTCCATAGTTGCCTGACTCCCCGTCGTGTAGATAACTACGATACGGGAGGGCT  
TACCATCTGGCCCCAGTGCTGCAATGATAACCGGAGACCCACGCTCACC GGCTCCAGATTTATCAGCAATAAACCCAG  
CCAGCCGGAAGGGCCGAGCGCAGAAGTGGTCTTGCAACTTTATCCGCTCCATCCAGTCTATTAATTGTTGCGGGGA  
AGCTAGAGTAAGTAGTTCCGCCAGTTAATAGTTTTGCGCAACGTTGTTGCCATTGCTACAGGCATCGTGGTGTACGCT  
CGTCGTTTTGGTATGGCTTCATTCAGCTCCGGTTCCCAACGATCAAGGCGAGTTACATGATCCCCCATGTTGTGCAAA  
AAAGCGGTTAGCTCCTTCGGTCTCCGATCGTTGTGAGAAGTAAGTTGGCCGAGTGTTATCACTCATGGTTATGGC  
AGCACTGCATAATTTCTTACTGTGCATGCCATCCGTAAGATGCTTTTTCTGTGACTGGTGAGTACTCAACCAAGTCAT  
TCTGAGAATAGTGTATGCGGGCAGCCGAGTTGCTCTTGCCCGGGCGTCAATACGGGATAATACCGCGCCACATAGCAGA  
ACTTTAAAAGTGCTCATCTTTGGAAAACGTTCTTCCGGGGCGAAAACCTCAAGGATCTTACC GGCTGTTGAGATCCAG  
TTCGATGTAACCCACTCGTGCACCCAACCTGATCTTTCAGCATCTTTTACTTTTACCAGCGTTTCTGGGTGAGCAAAA  
CAGGAAGGC AAAATGCCGCAAAAAGGGAATAAGGGCGACACGGAAATGTTGAATACTCATACTCTTCCCTTTTCAA  
TATTATTGAAGCATTATCAGGGTTATTGTCTCATGAGCGGATACATATTTGAATGTATTTAGAAAAATAAACAAAT  
AGGGGTTCCGCGCACATTTCCCCGAAAAGTGCCACCTAAATTTGTAAGCGTTAATATTTTGTAAAATTCGCGTTAAA  
TTTTTGTAAAATCAGCTCATTTTTTAAACCAATAGGCCGAAATCGGCAAAAATCCCTTATAAATCAAAAAGAATAGACCG  
AGATAGGGTTGAGTGTGTTCCAGTTTGGAAACAAGAGTCCACTATTAAGAACGTTGGACTCCAACGTCAAAGGGCGA  
AAAACCGTCTATCAGGGCGATGGCCCACTACGTGAACCATCACCTAATCAAGTTTTTTGGGGTTCGAGGTGCCGTAA  
AGCACTAAATCGGAACCTAAAGGGAGCCCCGATTTAGAGCTTGACGGGGAAAGCCGGCGAACGTGGCGAGAAAGG  
AAGGGAAGAAAGCGAAAGGAGCGGGCGCTAGGGCGCTGGCAAGTGTAGCGGTACGCTGCGCGTAACCACCACACCC  
GCCGCGCTTAAATGCGCCGCTACAGGGCGCGTCCCATTCCGCATTTCAGGCTGCGCAACTGTTGGGAAGGGCGATCGGT  
GCGGGCCTCTTCGCTATTACGCCAGCTGGCGAAAAGGGGGATGTGCTGCAAGGCGATTAAGTTGGGTAACGCCAGGGT  
TTTCCCAGTCACGACGTTGTA AAAACGACGGCCAGTGAGCGCGGTAATACGACTCACTATAGGGCGAATTGGGTACC  
GGCCCCCCCCCTCGATCGAG



scAAV-CAG-EGFP

Features:

- 1-105: Left trsΔITR
- 138-796f: CMV/CBA Promoter
- 817-1382: Hybrid CMV-Globin intron
- 1404-2135: EGFP
- 2143-2211: TK2 polyadenylation sequence
- 2248-2377: Right ITR
- 3140-4000: Ampicillin Resistance

CTGCGCGCTCGCTCGCTCACTGAGGCCGCCCGGGCAAAGCCCGGGCGTCCGGGCGACCTTTGGTCCGCCGGCCTCAGT  
GAGCGAGCGAGCGCGCAGAGAGGGAGTGTAGCCATGCTCTAGGAAGATCAATTCAATTCACGCGTTCGACATTGATTA  
TTGACTAGTTATTAATAGTAATCAATTACGGGGTCATTAGTTTCATAGCCCATATATGGAGTTCGCGGTTACATAACT  
TACGGTAAATGGCCCGCCTGGCTGACCGCCCAACGACCCCCGCCATTGACGTCAATAATGACGTATGTTCCCATAG  
TAACGCCAATAGGGACTTTCCATTGACGTCAATGGGTGGAGTATTTACGGTAAACTGCCCACTTGGCAGTACATCAA  
GTGTATCATATGCCAAGTACGCCCCCTATTGACGTCAATGACGGTAAATGGCCCGCCTGGCATTATGCCCAGTACAT  
GACCTTATGGGACTTTCCCTACTTGGCAGTACATCTACGTATTAGTCAATCGCTATTACCATGTTCGAGGCCACGTTCTG  
CTTCACTCTCCCCATCTCCCCCCCCCTCCCCACCCCAATTTTGTATTTATTTATTTTTTAATTTATTTTGTGCAGCGA  
TGGGGGCGGGGGGGGGGGCGCGCGCCAGGCGGGGCGGGGCGGGGCGAGGGGCGGGGCGGGGCGAGGCGGAGAGGTG  
CGGGCGCAGCCAATCAGAGCGGCGCGCTCCGAAAGTTTCTTTTTATGGCGAGGCGGGCGGGCGGGCCCTATAAAA  
AAGCGAAGCGCGCGGGCGGGGAGCAAGCTTCGTTTGTAGTGAACCGTCAGATCGCCTGGAGACGCCATCCACGCTGT  
TTTGACCTCCATAGAAGACACCGGGACCGATCCAGCCTCCGCGGATTTCGAATCCCGGCCGGGAACGGTGCATTGGAA  
CGCGGATTCCCCGTGCCAAGAGTGACGTAAGTACCGCCTATAGAGTCTATAGGCCACAAAAAATGCTTTCTTCTTT  
TAATATACTTTTTTGTATCTTATTTCTAATACTTTCCCTAATCTCTTTCTTTTCAGGGCAATAATGATACAATGTA  
TCATGCCTCTTTGCACCATTCTAAAGAATAACAGTGATAATTTCTGGGTAAAGGCAATAGCAATATTTCTGCATATA  
AATATTTCTGCATATAAATTTGTAAGTGTAAAGAGTTTCATATTGCTAATAGCAGCTACAATCCAGCTACCATTCT  
TGCTTTTATTTTTATGGTTGGGATAAGGCTGGATTATTCTGAGTCCAAGCTAGGCCCTTTTGTAAATCATGTTTCATAC  
CTCTTATCTCTCCACAGCTCCTGGGCAACGCTGGTCTGTGTGTGGCCCATCACTTTGGCAAGAATTTGGGA  
TTTCAACCGGTGCCACCATTGGTGGAGCAAGGGCGAGGAGCTGTTTACCGGGTGGTGGCCCATCTGTTGCGAGCTGGAC  
GGCAGCTAAACGGCCACAAGTTTCAAGCTGTCGCGGAGGGGCGAGGGCGATGCCACCTACGGCAAGCTGACCCTGAA  
GTTTCACTGCACCACCGCAAGCTGCCCGTGGCCACCCTCGTGACCACCCTGACCTACGGCGTGCAGTGTCT  
TCAGCCGCTACCCCGACCACATGAAGCAGCAGCACTTCTTCAAGTCCGCCATGCCCGAAGGCTACGTCCAGGAGCGC  
ACCATCTTCTTCAAGGACGACGGCAACTACAAGACCCGCGCCGAGGTGAAGTTTCGAGGGCGACACCCTGGTGAACCG  
CATCGAGCTGAAGGGCATCGACTTCAAGGAGGACGGCAACATCTGGGGCACAAGCTGGAGTACAACACTACAACAGCC  
ACAACGTCTATATCATGGCCGACAAGCAGAAGAACGGCATCAAGGTGAACCTTCAAGATCCGCCACAACATCGAGGAC  
GGCAGCGTGCAGCTCGCCGACCACTACCAGCAGAACCCCCATCGGGCAGCGCCCCGTGCTGCTGCCGACAACCA  
CTACCTGAGCACCCAGTCCGCCCTGAGCAAAGACCCCAACGAGAAGCGCGATCACATGGTCTGCTGGAGTTCGTGA  
CCGCCCGGGGATCACTCTCGGCATGGACGAGCTGTACAAGTCCGGACTCAGATAGTCTCGAGTGGCCGCAATAAAA  
TATCTTTATTTTTATTACATCTGTGTGTTGGTTTTTTGTGTGAGGATCTCCTAGGTAGATAAGTAGCATGGCGGGTT  
AATCATTAACTACAAGGAACCCCTAGTGTGGAGTTGGCCACTCCCTCTCTGCGCGCTCGCTCGCTCACTGAGGCCG  
GGCGACCAAGGTCGCCCGACGCCCGGGCTTTGCCCGGGCGGCTCAGTGGAGCGAGCGCGCAGCCTTAATTA  
CCTAATTCAGTGGCCGTGTTTTACAACGTGCTGACTGGGAAAACCCCTGGCGTTACCCCACTTAATCGCCTTGCAGC  
ACATCCCCCTTTTCGCGAGCTGGCGTAATAGCGAAGAGGCCCGACCCGATCGCCCTTCCCAACAGTTGCGCAGCCTGA  
ATGGCGAATGGGACGCGCCCTGTAGCGGCGCATTAAAGCGCGGGGTTGGTGGTTACGCGCAGCGTGACCGCTACA  
CTTGCCAGCGCCCTAGCGCCGCTCCTTTTCGCTTTCTTCCCTTCTTTCTCGCCACGTTTCGCCGGCTTTCCCCGTCA  
AGCTCTAAATCGGGGGCTCCCTTTAGGGTTCCGATTTAGTGTCTTACGGCACCTCGACCCAAAAAATTTGATTAGG  
GTGATGGTTACGTAAGTGGGCCATCGCCCTGATAGACGGTTTTTTCGCCCTTTGACGTTGGAGTCCACGTTCTTTAAT  
AGTGGACTCTTGTTCCAAACCTGGAACAACACTCAACCCTATCTCGGTCTATTCTTTTGTATTTATAAGGGATTTTGCC  
GATTTCCGCCCTATTGGTTAAAAAATGAGCTGATTTAAACAAAAATTTAACGCGAATTTTAAACAAAAATTTAACGCTTA  
CAATTTAGGTGGCACTTTTCGGGAAATGTGCGCGGAACCCCTATTTGTTTATTTTTCTAAATACATTCAAATATGT  
ATCCGCTCATGAGACAATAACCCCTGATAAATGCTTCAATAATATTGAAAAAGGAAGAGTATGAGTATTCAACATTTT  
CGTGTGCCCTTATTCCCTTTTTTGGCGCATTTTTGCCTTCCCTGTTTTTGTCTACCCAGAAAACGCTGGTGAAGTAAA  
AGATGCTGAAGATCAGTTGGGTGCACGAGTGGGTTACATCGAAGTGGATCTCAACAGCGGTAAGATCTTTGAGAGTT  
TTCGCCCCGAAGAAGCTTTTCCAATGATGAGCACTTTTAAAGTTCTGCTATGTGGCGCGGCTATTATCCCGTATGAC  
GCCGGGCAAGAGCAACTCGGTCCCGCATACACTATTTTAAAGTTCTGCTATGTGGCGCGGCTATTATCCCGTATGAC  
GCATCTTACGGATGGCATGACAGTAAGAGAATTATGCAAGTGTGCCATAACCATGAGTGATAACACTGCGGCCAACT  
TACTTCTGACAACGATCGGAGGACCGAAGGAGCTAACCGCTTTTTTGCACAACATGGGGGATCATGTAACCTGCCTTT  
GATCGTTGGGAACCGGAGCTGAATGAAGCCATACCAAACGACGAGCGTGACACCACGATGCCTGTAGCAATGGCAAC  
AACGTTGCGCAAACCTATTAACCTGGCGAACTACTTACTCTAGCTTCCCGGCAACAATTAATAGACTGGATGGAGGCGG

ATAAAGTTGCAGGACCACTTCTGCGCTCGGCCCTTCCGGCTGGCTGGTTTTATTGCTGATAAAATCTGGAGCCGGTGAG  
CGTGGGTCTCGCGGTATCATTGCAGCACTGGGGCCAGATGGTAAGCCCTCCCGTATCGTAGTTATCTACACGACGGG  
GAGTCAGGCAACTATGGATGAACGAAATAGACAGATCGCTGAGATAGGTGCCTCACTGATTAAGCATTGGTAACGTG  
CAGACCAAGTTTACTCATATATACTTTAGATTGATTTAAAACCTCATTTTTTAATTTAAAAGGATCTAGGTGAAGATC  
CTTTTTGATAATCTCATGACCAAAATCCCTTAACGTGAGTTTTCGTTCCACTGAGCGTCAGACCCCGTAGAAAAGAT  
CAAAGGATCTTCTTGAGATCCTTTTTTTCTGCGCGTAATCTGCTGCTTGCAAACAAAAAACCACCGCTACCAGCGG  
TGGTTTGTGGCCGGATCAAGAGCTACCAACTCTTTTTCCGAAGGTAACCTGGCTTCAGCAGAGCGCAGATACCAAT  
ACTGTTCTTCTAGTGTAGCCGTAGTTAGGCCACCACTTCAAGAACTCTGTAGCACCGCCTACATACCTCGCTCTGCT  
AATCCTGTTACCAGTGGCTGCTGCCAGTGGCGATAAGTCGTGTCTTACCGGGTTGGACTCAAGACGATAGTTACCGG  
ATAAGGCGCAGCGGTCTGGGCTGAACGGGGGGTTCGTGCACACAGCCAGCTTGGAGCGAACGACCTACACCGAACTG  
AGATACCTACAGCGTGAGCTATGAGAAAGCGCCACGCTTCCCGAAGGGAGAAAGGCGGACAGGTATCCGGTAAGCGG  
CAGGGTCGGAACAGGAGAGCGCACGAGGGAGCTTCCAGGGGAAACGCCTGGTATCTTTATAGTCCTGTCTGGGTTTT  
GCCACCTCTGACTTGAGCGTCGATTTTTGTGATGCTCGTCAGGGGGCGGAGCCTATGGAAAAACGCCAGCAACGCG  
GCCTTTTTACGGTTCCTGGCCTTTTGCTGGCCTTTTGCTCACATGTTCTTTCTGCGTTATCCCCTGATTCTGTGGA  
TAACCGTATTACCGCCTTTGAGTGAGCTGATACCGCTCGCCGAGCCGAACGACCGAGCGCAGCGAGTCAGTGAGCG  
AGGAAGCGGAAGAGCGCCCAATACGCAAACCGCCTCTCCCCGCGCGTTGGCCGATTCAATTAATGCAGCTGGCAGC  
AGGTTTCCCGACTGGAAAGCGGGCAGTGAGCGCAACGCAATTAATGTGAGTTAGCTCACTCATTAGGCACCCAGGC  
TTTACACTTTATGCTTCCGGCTCGTATGTTGTGTGGAATTGTGAGCGGATAACAATTTACACAGGAAACAGCTATG  
ACCATGATTACGCCAGATTTAATTAAGGCCTTAATTAGG
